# Supplementary material
Source: HighWire-hosted journal article supplement (https://jnm.snmjournals.org/highwire/filestream/94580/field_highwire_adjunct_files/0/138032_Supplemental_Data.pdf)
Supplement: 138032_Supplemental_Data.pdf [file 138032_Supplemental_Data.pdf]

**Supplemental Table 1 Description of the 10 Completed DaTscan Clinical Trials**

|                                             | Trial                                                                                                                                                                     |                                                                                                                                                                           |                                                                                                                                                                       |                                                                                                                                                                                                            |
|---------------------------------------------|---------------------------------------------------------------------------------------------------------------------------------------------------------------------------|---------------------------------------------------------------------------------------------------------------------------------------------------------------------------|-----------------------------------------------------------------------------------------------------------------------------------------------------------------------|------------------------------------------------------------------------------------------------------------------------------------------------------------------------------------------------------------|
|                                             | CY95.FP.I <sup>a</sup>                                                                                                                                                    | CY96.FP.II <sup>b</sup>                                                                                                                                                   | PDT02005 <sup>c</sup>                                                                                                                                                 | DP008-003 <sup>d</sup>                                                                                                                                                                                     |
| <b>Trial Design</b>                         | <ul style="list-style-type: none"> <li>Phase 1</li> <li>Single-center</li> <li>Open-label</li> <li>Non-controlled</li> <li>Non-randomized</li> <li>Single-dose</li> </ul> | <ul style="list-style-type: none"> <li>Phase 2</li> <li>Single-center</li> <li>Open-label</li> <li>Non-controlled</li> <li>Non-randomized</li> <li>Single-dose</li> </ul> | <ul style="list-style-type: none"> <li>Phase 2</li> <li>Single-center</li> <li>Open-label</li> <li>Controlled</li> <li>Non-randomized</li> <li>Single-dose</li> </ul> | <ul style="list-style-type: none"> <li>Phase 3</li> <li>Multi-center</li> <li>Open-label</li> <li>Controlled</li> <li>Non-randomized</li> <li>Single-dose</li> </ul>                                       |
| <b>Population</b>                           | <ul style="list-style-type: none"> <li>Healthy volunteers</li> </ul>                                                                                                      | <ul style="list-style-type: none"> <li>Healthy volunteers</li> <li>Subjects with PD</li> </ul>                                                                            | Subjects with: <ul style="list-style-type: none"> <li>PD or</li> <li>Cerebrovascular disease</li> </ul>                                                               | <ul style="list-style-type: none"> <li>Healthy volunteers</li> <li>Subjects with:               <ul style="list-style-type: none"> <li>PD</li> <li>MSA</li> <li>PSP, or</li> <li>ET</li> </ul> </li> </ul> |
| <b>Type of Control</b>                      | None                                                                                                                                                                      | None                                                                                                                                                                      | Healthy volunteers (historical control)                                                                                                                               | Healthy volunteers                                                                                                                                                                                         |
| <b>DaTscan™ Doses</b>                       | 111 MBq                                                                                                                                                                   | 111 MBq                                                                                                                                                                   | 111-185 MBq                                                                                                                                                           | 111-185 MBq                                                                                                                                                                                                |
| <b>Clinical Conduct</b>                     | 25 Apr 1996 to 27 Jun 1996                                                                                                                                                | 01 Jan 1997 to 21 Mar 1997                                                                                                                                                | 31 Mar 1999 to 07 Nov 2000                                                                                                                                            | 25 Aug 1997 to 24 Feb 1998                                                                                                                                                                                 |
| <b>No. of Subjects who Received DaTscan</b> | 12 (12 HV)                                                                                                                                                                | 30 (10 HV; 20 PD)                                                                                                                                                         | 51 (26 PS; 25 non-PS)                                                                                                                                                 | 224 (35 HV; 160 PS; 29 ET)                                                                                                                                                                                 |
| <b>No. of Subjects Evaluable for Safety</b> | 12                                                                                                                                                                        | 30                                                                                                                                                                        | 51                                                                                                                                                                    | 224                                                                                                                                                                                                        |
| <b>Age Range, Years (Mean)</b>              | 32, 59 (42.3)                                                                                                                                                             | 40, 69 <ul style="list-style-type: none"> <li>HV, male (67.0)</li> <li>HV, female (51.2)</li> <li>PD, male (57.2)</li> <li>PD, female (54.7)</li> </ul>                   | 44.0, 83.1 (65.5)                                                                                                                                                     | 40, 80 (62.7)                                                                                                                                                                                              |
| <b>Gender (% M/F)</b>                       | 50/50                                                                                                                                                                     | 60/40                                                                                                                                                                     | 66/34                                                                                                                                                                 | 61/39                                                                                                                                                                                                      |
| <b>Race (% C/B/O)</b>                       | 92/8/0                                                                                                                                                                    | 97/0/3                                                                                                                                                                    | 100/0/0                                                                                                                                                               | 98/1/<1                                                                                                                                                                                                    |

|                                             | Trial                                                                                                                                                                                                                 |                                                                                                                                                                      |                                                                                                                                                                          |                                                                                                                                                                               |
|---------------------------------------------|-----------------------------------------------------------------------------------------------------------------------------------------------------------------------------------------------------------------------|----------------------------------------------------------------------------------------------------------------------------------------------------------------------|--------------------------------------------------------------------------------------------------------------------------------------------------------------------------|-------------------------------------------------------------------------------------------------------------------------------------------------------------------------------|
|                                             | PDT304 <sup>e</sup>                                                                                                                                                                                                   | PDT03007 <sup>f</sup>                                                                                                                                                | PDT301 <sup>g</sup>                                                                                                                                                      | PDT408 <sup>h</sup>                                                                                                                                                           |
| <b>Trial Design</b>                         | <ul style="list-style-type: none"> <li>Phase 3</li> <li>Multi-center</li> <li>Open-label</li> <li>Controlled</li> <li>Non-randomized</li> <li>Repeat administration (at 18-month intervals), up to 3 doses</li> </ul> | <ul style="list-style-type: none"> <li>Phase 3</li> <li>Multi-center</li> <li>Open-label</li> <li>Controlled</li> <li>Non-randomized</li> <li>Single-dose</li> </ul> | <ul style="list-style-type: none"> <li>Phase 3</li> <li>Multi-center</li> <li>Open-label</li> <li>Non-controlled</li> <li>Non-randomized</li> <li>Single-dose</li> </ul> | <ul style="list-style-type: none"> <li>Phase 3b/4</li> <li>Multi-center</li> <li>Open-label</li> <li>Non-controlled</li> <li>Non-randomized</li> <li>Up to 2 doses</li> </ul> |
| <b>Population</b>                           | <ul style="list-style-type: none"> <li>Healthy volunteers</li> <li>Subjects with the clinical features of <ul style="list-style-type: none"> <li>Early PD or</li> <li>Tremor (mainly ET)</li> </ul> </li> </ul>       | <ul style="list-style-type: none"> <li>Healthy volunteers</li> <li>Subjects with: <ul style="list-style-type: none"> <li>PS or</li> <li>ET</li> </ul> </li> </ul>    | <ul style="list-style-type: none"> <li>Subjects with dementia</li> </ul>                                                                                                 | <ul style="list-style-type: none"> <li>Subjects with clinically uncertain parkinsonian symptoms</li> </ul>                                                                    |
| <b>Type of Control</b>                      | Healthy volunteers                                                                                                                                                                                                    | Healthy volunteers                                                                                                                                                   | None                                                                                                                                                                     | None                                                                                                                                                                          |
| <b>DaTscan Doses</b>                        | 111-185 MBq (3 to 5 mCi)                                                                                                                                                                                              | 111-185 MBq (3 to 5 mCi)                                                                                                                                             | 111-185 MBq (3 to 5 mCi)                                                                                                                                                 | 111-185 MBq (3 to 5 mCi)                                                                                                                                                      |
| <b>Clinical Conduct</b>                     | 18 Jan 1999 to 28 Jun 2005                                                                                                                                                                                            | 18 Jan 2000 to 27 Oct 2000                                                                                                                                           | 21 Nov 2003 to 28 Jun 2006                                                                                                                                               | 21 Nov 2000 to 14 Nov 2003                                                                                                                                                    |
| <b>No. of Subjects who Received DaTscan</b> | 179                                                                                                                                                                                                                   | 31<br>(8 HV; 20 PS; 3 ET)                                                                                                                                            | 326<br>(326 dementia)                                                                                                                                                    | 120<br>(61 PS, 34 other, 25 unknown)                                                                                                                                          |
| <b>No. of Subjects Evaluable for Safety</b> | 179                                                                                                                                                                                                                   | 31                                                                                                                                                                   | 326                                                                                                                                                                      | 120                                                                                                                                                                           |
| <b>Age Range, Years (Mean)</b>              | 33, 86 (61.6)                                                                                                                                                                                                         | 44.4, 76.7<br><ul style="list-style-type: none"> <li>PS (63.1)</li> <li>ET (64.4)</li> <li>HV (61.5)</li> </ul>                                                      | 54, 90 (73.9)                                                                                                                                                            | 25, 84 (65.1)                                                                                                                                                                 |
| <b>Gender (% M/F)</b>                       | 57/43                                                                                                                                                                                                                 | 52/48                                                                                                                                                                | 57/43                                                                                                                                                                    | 50/50                                                                                                                                                                         |
| <b>Race (% C/B/O)</b>                       | 100/0/0                                                                                                                                                                                                               | 94/3/3                                                                                                                                                               | 100/0/0                                                                                                                                                                  | 98/1/1                                                                                                                                                                        |

|                                             | Trial                                                                                                                                                            |                                                                                                                                                                  |
|---------------------------------------------|------------------------------------------------------------------------------------------------------------------------------------------------------------------|------------------------------------------------------------------------------------------------------------------------------------------------------------------|
|                                             | PDT409 <sup>i</sup>                                                                                                                                              | 001-013 <sup>j</sup>                                                                                                                                             |
| <b>Trial Design</b>                         | <ul style="list-style-type: none"> <li>Phase 4</li> <li>Multi-center</li> <li>Open-label</li> <li>Controlled</li> <li>Randomized</li> <li>Single-dose</li> </ul> | <ul style="list-style-type: none"> <li>Phase 4</li> <li>Multi-center</li> <li>Open-label</li> <li>Controlled</li> <li>Randomized</li> <li>Single-dose</li> </ul> |
| <b>Population</b>                           | <ul style="list-style-type: none"> <li>Subjects with clinically uncertain parkinsonism</li> </ul>                                                                | <ul style="list-style-type: none"> <li>Subjects with a clinically uncertain diagnosis of DLB</li> </ul>                                                          |
| <b>Type of Control</b>                      | No-imaging group                                                                                                                                                 | No-imaging group                                                                                                                                                 |
| <b>DaTscan Doses</b>                        | 111-185 MBq (3 to 5 mCi)                                                                                                                                         | 111-185 MBq (3 to 5 mCi)                                                                                                                                         |
| <b>Clinical Conduct</b>                     | 02 Oct 2006 to 03 Jan 2011                                                                                                                                       | 14 Jan 2011 to 08 Oct 2012                                                                                                                                       |
| <b>No. of Subjects who Received DaTscan</b> | 122                                                                                                                                                              | 116                                                                                                                                                              |
| <b>No. of Subjects Evaluable for Safety</b> | 122                                                                                                                                                              | 116                                                                                                                                                              |
| <b>Age Range (Mean)</b>                     | 19, 87 (66.9)                                                                                                                                                    | 54, 90 (75.3)                                                                                                                                                    |
| <b>Gender (% M/F)</b>                       | 53/46                                                                                                                                                            | 55/45                                                                                                                                                            |
| <b>Race (% C/B/O)</b>                       | 98/1/1                                                                                                                                                           | 100/0/0                                                                                                                                                          |

% C/B/O = percent subjects by race: Caucasian/Black/Other races; DLB = dementia with Lewy bodies; ET = essential tremor; EudraCT = European Union Drug Regulatory Affairs Clinical Trials (database); F = female; HV = healthy volunteers; [<sup>123</sup>I]FP-CIT = <sup>123</sup>I-2-β-carbomethoxy-3β-(4-iodophenyl)-N-(3-fluoropropyl)nortropine (DaTscan); M = male; MSA = multiple system atrophy; PD = Parkinson's disease; PS = parkinsonian syndrome(s); PSP = progressive supranuclear palsy; SPECT = single-photon emission computed tomography.

<sup>a</sup> A single centre open study of an intravenous dopamine transporter ligand, containing 111 MBq [<sup>123</sup>I]FP-CIT, in healthy volunteers to examine biodistribution, safety, and tolerability.

<sup>b</sup> A single centre open study of an intravenous dopamine transporter ligand, containing 111 MBq [<sup>123</sup>I]FP-CIT, in healthy volunteers and patients with Parkinson's disease to examine uptake kinetics in various brain regions and safety.

<sup>c</sup> An open, single centre, Phase 2, clinical and imaging study to assess the striatal uptake of an intravenous solution, DaTscan, containing a dopamine transporter radio-ligand in subjects with vascular parkinsonism compared to subjects with cerebrovascular disease.

<sup>d</sup> A multicentre, Phase 3, clinical study to compare the striatal uptake of an intravenous solution containing a dopamine transporter radio-ligand, [<sup>123</sup>I]FP-CIT, in patients diagnosed with Parkinson's disease, multiple system atrophy, progressive supranuclear palsy, and definite essential tremor.

<sup>e</sup> (Also known as PDT03004. Diagnosis at baseline, 18 and 36 months.) An open, Phase 3, clinical study to assess the striatal uptake of an intravenous solution containing the dopamine transporter radio-ligand, DaTscan, in patients with early parkinsonism.

<sup>f</sup> (Subjects in this trial were from "d.") A Phase 3, multicentre, open clinical study to assess the striatal uptake of intravenous DaTscan, to monitor progression, in healthy volunteers and subjects previously diagnosed with parkinsonian syndrome and essential tremor, by SPECT imaging.

<sup>g</sup> An open-label, Phase 3, clinical study to assess the striatal uptake of an intravenous solution containing the dopamine transporter radio-ligand, DaTscan, in subjects with dementia with Lewy bodies.

<sup>h</sup> A Phase 3b/4, multicentre, open-label, non-comparative clinical study to assess the striatal uptake of intravenous DaTscan ([<sup>123</sup>I]ioflupane injection) in subjects with clinically uncertain parkinsonian syndromes.

<sup>i</sup> A multicentre, randomized, open-label, comparative Phase 4 trial to assess changes in clinical management after DaTscan imaging of subjects with clinically uncertain parkinsonism.

<sup>j</sup> A multicentre, randomised, open-label, comparative Phase 4 trial to assess, changes in dementia diagnostic category and diagnostic confidence after, DaTscan imaging in subjects with an uncertain diagnosis of dementia with Lewy bodies (possible DLB).

## Supplemental Table 2 Key Criteria for Diagnoses of Patients Included in the 10 Completed DaTscan Clinical Trials

|           |                                                                                                                                                                                                                                                                                                                                                                                                                                                                                                                                                                                                                                                                                                               |
|-----------|---------------------------------------------------------------------------------------------------------------------------------------------------------------------------------------------------------------------------------------------------------------------------------------------------------------------------------------------------------------------------------------------------------------------------------------------------------------------------------------------------------------------------------------------------------------------------------------------------------------------------------------------------------------------------------------------------------------|
| PS/PD     | United Kingdom Parkinson's Disease Society Brain Bank criteria Steps 1 to 3 and Unified Parkinson's Disease Rating Scale Part III score pre-defined (as applicable to general PS, early or late PD)                                                                                                                                                                                                                                                                                                                                                                                                                                                                                                           |
| CUPS      | Signs/symptoms of PS but no specific clinical diagnosis was established yet, or PS with doubt whether diagnosis was PD, MSA, or PSP                                                                                                                                                                                                                                                                                                                                                                                                                                                                                                                                                                           |
| MSA       | Satisfaction of the Consensus Committee of the American Autonomic Society and the American Academy of Neurology diagnosis criteria <sup>s-1</sup>                                                                                                                                                                                                                                                                                                                                                                                                                                                                                                                                                             |
| PSP       | Poor or non-response to levodopa and criteria of NINDS and the Society for PSP <sup>s-2</sup>                                                                                                                                                                                                                                                                                                                                                                                                                                                                                                                                                                                                                 |
| Dementias | Positive assessment for dementia according to the Diagnostic and Statistical Manual of Mental Disorder – Fourth Edition and at least one of the following: DLB as defined by the International Consensus Criteria or the independent expert committee's consensus for DLB, (dementia +1 core feature or 1 or more suggestive features), patients may or may not have also fulfilled criteria for AD, and no significant vascular pathology; the criteria of the National Institute of Neurological and Communicative Disorders and Stroke-AD and Related Disorders for AD; or the criteria of the NINDS-Association Internationale Pour la Recherche et l'Enseignement en Neurosciences for vascular dementia |
| ET        | Satisfaction of Findley and Koller definitions and classifications for clinical diagnosis and long-standing condition (>5 years) <sup>s-3</sup>                                                                                                                                                                                                                                                                                                                                                                                                                                                                                                                                                               |

AD = Alzheimer's disease; CUPS = clinically uncertain parkinsonian syndrome; DLB = dementia with Lewy bodies; MSA = multiple system atrophy;

NINDS = National Institute for Neurological Disorders and Stroke; PD = Parkinson's disease; PS = parkinsonian syndrome; PSP = progressive supranuclear palsy.

- s-1. Consensus Committee of the American Autonomic Society and the American Academy of Neurology. Consensus statement on the definition of orthostatic hypotension, pure autonomic failure, and multiple system atrophy. *Neurology*. 1996;46:1470.
- s-2. Litvan I, Agid Y, Calne D, et al. Clinical research criteria for the diagnosis of progressive supranuclear palsy (Steele-Richardson-Olszewski syndrome): report of the NINDS-SPSP international workshop. *Neurology*. 1996;47:1-9.
- s-3. Findley LJ, Koller WC. Definitions and Behavioral Classifications. In: Findley LJ, editor. *The Handbook of Tremor Disorders*. New York: Marcel Dekker; 1994:1-5.

**Supplemental Table 3 Safety Parameters Collected in the 10 Completed DaTscan Clinical Trials**

| <b>Trial</b>            | <b>Phase</b> | <b>AES<sup>a</sup></b> | <b>VS</b> | <b>EKG</b> | <b>Hem</b> | <b>Chem</b> | <b>U/A</b> | <b>Coag</b> | <b>PE</b> | <b>NE</b> |
|-------------------------|--------------|------------------------|-----------|------------|------------|-------------|------------|-------------|-----------|-----------|
| CY95.FP.I <sup>b</sup>  | 1            | X                      | X         | X          | X          | X           | X          |             |           |           |
| CY96.FP.II              | 2            | X                      | X         | X          | X          | X           | X          |             |           |           |
| PDT02005                | 2            | X                      | X         | X          | X          | X           | X          | X           | X         |           |
| DP008-003               | 3            | X                      | X         | X          | X          | X           | X          |             |           |           |
| PDT304                  | 3            | X                      | X         | X          | X          | X           | X          |             | X         |           |
| PDT03007                | 3            | X                      | X         | X          | X          | X           | X          | X           | X         |           |
| PDT301                  | 3            | X                      | X         | X          | X          | X           | X          |             | X         | X         |
| PDT408                  | 3b/4         | X                      |           |            |            |             |            |             |           |           |
| GE-001-013 <sup>c</sup> | 4            | X                      |           |            |            |             |            |             |           | X         |
| PDT409                  | 4            | X                      |           |            |            |             |            |             |           | X         |

---

AEs = adverse events; Coag = coagulation; Chem = (serum) chemistry, EKG = electrocardiogram; Hem = hematology;

NE = neurological examination; PE = physical examination; U/A = urinalysis; VS = vital signs.

<sup>a</sup> Included injection site reactions.

<sup>b</sup> Also included electroencephalogram.

**Supplemental Table 4 Number (%) of Subjects in the 10 Completed DaTscan Clinical Trials by Final Diagnosis, Trial, and Overall (Safety Population)**

|                |     | Trial, N  |            |                  |          |        |        |        |        |         |       |    |    |    |    |    |    |     |      |     |      |     |
|----------------|-----|-----------|------------|------------------|----------|--------|--------|--------|--------|---------|-------|----|----|----|----|----|----|-----|------|-----|------|-----|
|                |     | CY95.FP.I | CY96.FP.II | DP008-003        | PDT02005 | PDT304 | PDT301 | PDT408 | PDT409 | 001-013 | Total |    |    |    |    |    |    |     |      |     |      |     |
|                |     | 12        | 30         | 224 <sup>a</sup> | 51       | 179    | 326    | 120    | 122    | 116     | 1180  |    |    |    |    |    |    |     |      |     |      |     |
| Dx             | SDD | n         | %          | n                | %        | n      | %      | n      | %      | n       | %     | n  | %  |    |    |    |    |     |      |     |      |     |
| PS             | Yes | 0         | 0          | 20               | 4        | 160    | 35     | 26     | 6      | 142     | 31    | 0  | 0  | 61 | 13 | 47 | 10 | 0   | 0    | 456 | 38.6 |     |
|                | DLB | 0         | 0          | 0                | 0        | 0      | 0      | 0      | 0      | 168     | 69    | 0  | 0  | 0  | 0  | 0  | 0  | 74  | 31   | 242 | 20.5 |     |
| ET             | No  | 0         | 0          | 0                | 0        | 29     | 59     | 0      | 0      | 0       | 0     | 0  | 0  | 0  | 0  | 0  | 20 | 41  | 0    | 0   | 49   | 4.2 |
|                | HV  | 12        | 21         | 10               | 18       | 35     | 61     | 0      | 0      | 0       | 0     | 0  | 0  | 0  | 0  | 0  | 0  | 0   | 0    | 57  | 4.8  |     |
| O <sup>b</sup> | -   | 0         | 0          | 0                | 0        | 25     | 8      | 37     | 11     | 158     | 48    | 34 | 10 | 35 | 11 | 41 | 12 | 330 | 28.0 |     |      |     |
| U              | -   | 0         | 0          | 0                | 0        | 0      | 0      | 0      | 0      | 0       | 0     | 25 | 54 | 20 | 43 | 1  | 2  | 46  | 3.9  |     |      |     |

DLB = dementia with Lewy bodies; Dx = baseline diagnosis; ET essential tremor; HV = healthy volunteers; MSA = multiple system atrophy; O = other; PD = Parkinson's disease; PS = parkinsonian syndrome (PD, PSP, MSA); PSP = progressive supranuclear palsy; SDD = striatal dopaminergic deficiency; U = unknown.

<sup>a</sup> Eligible subjects from DP008-003 entered into PDT307 and are counted only once.

<sup>b</sup> For example Alzheimer's disease, vascular dementia.



**Supplemental Table 5 All Adverse Events Occurring in >1 Subject in Descending Order of Frequency in the  
10 Completed Clinical Trials**

| <b>No. (%) of subjects</b>        |            |                                                                                                                            |
|-----------------------------------|------------|----------------------------------------------------------------------------------------------------------------------------|
| <b>experiencing</b>               |            |                                                                                                                            |
| <b>each listed AE<sup>a</sup></b> |            |                                                                                                                            |
| <b>(N = 1180)</b>                 |            | <b>Adverse event (AE)</b>                                                                                                  |
| <b>n</b>                          | <b>(%)</b> | <b>Medical Dictionary for Regulatory Activities [MedDRA] preferred term<sup>b</sup></b>                                    |
| 42                                | (4)        | Headache.                                                                                                                  |
| 21                                | (2)        | Nausea, dizziness.                                                                                                         |
| 16                                | (1)        | Nasopharyngitis.                                                                                                           |
| 12                                | (1)        | Injection site hematoma.                                                                                                   |
| 10                                | (<1)       | Urinary tract infection, fall, arthralgia, back pain, neck pain.                                                           |
| 9                                 | (<1)       | Hematoma, hypertension.                                                                                                    |
| 8                                 | (<1)       | Diarrhea, injection site erythema, pain in extremity.                                                                      |
| 7                                 | (<1)       | Tremor.                                                                                                                    |
| 6                                 | (<1)       | Dry mouth, fatigue, influenza, balance disorder.                                                                           |
| 5                                 | (<1)       | Anemia, vertigo, constipation, chest pain, lower respiratory tract infection, hypercholesterolemia, depression, epistaxis. |

|   |      |                                                                                                                                                                                                                                                                                                                                                                                                                                                                                                                                                                                                                                                                        |
|---|------|------------------------------------------------------------------------------------------------------------------------------------------------------------------------------------------------------------------------------------------------------------------------------------------------------------------------------------------------------------------------------------------------------------------------------------------------------------------------------------------------------------------------------------------------------------------------------------------------------------------------------------------------------------------------|
| 4 | (<1) | Angina pectoris, abdominal pain, vomiting, muscle spasms, musculoskeletal pain, myalgia, spinal osteoarthritis, cough.                                                                                                                                                                                                                                                                                                                                                                                                                                                                                                                                                 |
| 3 | (<1) | Myocardial infarction, hunger, vessel puncture site hematoma, pneumonia, femoral neck fracture, diabetes mellitus, arthritis, joint swelling, osteoarthritis, formication (i.e., paraesthesia), lethargy, somnolence, tension headache, anxiety, rash.                                                                                                                                                                                                                                                                                                                                                                                                                 |
| 2 | (<1) | Arrhythmia, atrial fibrillation, irritable bowel syndrome, asthenia, influenza-like illness, malaise, peripheral edema, ear infection, eye infection, infection, respiratory tract infection, contusion, joint dislocation, joint injury, blood bilirubin increased, EKG abnormal, hepatic enzyme increased, platelet count decreased, groin pain, intervertebral disc protrusion, limb discomfort, prostate cancer, akinesia, dementia, dysgeusia, epilepsy, mental impairment, paraesthesia, restless legs syndrome, stress, hematuria, nocturia, pollakiuria, renal pain, dyspnea, pharyngolaryngeal pain, flushing, orthostatic hypotension, Raynaud's phenomenon. |

- 
- <sup>a</sup> The number (percentage) of subjects with each unique AE listed; e.g., 21/1180 subjects (2%) experienced nausea and 21/1180 subjects (2%) experienced dizziness; they were not necessarily the same 21 subjects. For any given subject, a unique AE is counted only once; e.g., a subject who experienced headache twice is counted only once. Hence, every unique AE is identified, and every subject is counted only once for each unique AE.
- <sup>b</sup> The order of presentation for AEs is alphabetical (i) within System Organ Class (SOC), (ii) then by MedDRA preferred term for the AE. SOCs in which >1 subject had an AE include the following: Blood and lymphatic system disorders; Cardiac disorders; Ear and labyrinth disorders; Gastrointestinal disorders; General disorders and administration site conditions; Infections and infestations; Injury, poisoning and procedural complications; Investigations; Metabolism and nutrition disorders; Musculoskeletal and connective tissue disorders; Neoplasms benign, malignant and unspecified (including cysts and polyps); Nervous system disorders; Psychiatric system disorders; Renal and urinary disorders; Respiratory, thoracic and mediastinal disorders; Skin and subcutaneous system disorders; Vascular disorders.

## **Supplemental Disclosure Appendix**

This report and associated clinical trials were sponsored by GE Healthcare, Princeton, NJ, USA.

Dr. Grosset has received research support from Merz Pharma, consultancy fees from AbbieVie and Civitas, and honoraria for speaking from AbbieVie, GE Healthcare, and UCB Pharma.

Dr. Tatsch has received honoraria for educational presentations on DaTscan from GE Healthcare.

Dr. Oertel has received honoraria for educational presentations about DaTscan imaging between 2001 and 2013.

Dr. Tolosa has received honoraria for consultancy from Novartis, TEVA, Boehringer Ingelheim, UCB, Solvay, and Lundbeck.

Dr. Bajaj has received honoraria from UCB, Teva, GSK, Genus, GE Healthcare, Lilly, and has received grant support from GE Healthcare.

Dr. Kupsch has acted as an advisor to Medtronic USA; has received honoraria from Allergan, Boehringer Ingelheim, Ipsen Pharma, Lundbeck, Medtronic, Merck, Merz Pharmaceuticals, Orion, St. Jude, UCB; and grants from the German Research Council and the German Ministry of Education and Research.

Dr. O'Brien has acted as a consultant to GE Healthcare, Bayer Healthcare, Lilly, TauRx and Cytos and received grant funding from GE Healthcare and Lilly.

Dr. Seibyl has acted as a consultant to GE Healthcare, Piramal Imaging, and Navidea Biopharmaceuticals, and has equity interest in Molecular Neuroimaging, LLC.

Dr. Walker has received funding for travel, consultancy, and speaker fees and research support from GE Healthcare; consultancy fees from Bayer Healthcare and Novartis; and research support from Lundbeck.

Dr. Chen is an employee of H2O Clinical, LLC.

Drs. Grachev and Sherwin are employees of GE Healthcare.

## Supplemental Coinvestigator Appendix

### Investigators by Study

The affiliation of participating investigators is listed as that during the trial.

**CY95.FP.I and CY96.FP.II:** Eric A vanRoyen, MD, PhD (Academic Medical Centre [AMC] of the University of Amsterdam, Principal Investigator [PI]); Jan Booij, MD (AMC, Clinical Trial Physician), Ellinor Busemann Sokole, MSc, PhD (AMC, Nuclear Medicine Physicist); JD Speelman, MD (AMC, Neurologist); Bernard Johan De Vries, MSc, PhD (Farma Research/Nijmegen [Contract Research Organization {CRO}], Study Coordinator).

**PDT02005:** From University of Glasgow, Southern General Hospital: Donald G Grosset, BSc, MD, FRCP (Neurologist); Jim Patterson, BSc, PhD, MIPEM (Clinical Physicist); Hani Benamer, MB BCh, MRCP (Neurologist); Dr. Donald Hadley (Radio-neurologist); Dr. Katherine A Grosset (Clinical Neurology Assistant); Elaine Tyrrell (Research Nurse); Tracy Murphy (Research Nurse).

**DP008-003:** From AMC: Dr. Eric A vanRoyen (PI); Drs. JD Speelman and Jan Booij (Coinvestigators). From University of Marburg: Drs. Wolfgang H Oertel and K Joseph (Site PIs); Drs. Anja Gerstner, Sylvia Rura, Helmut Höffken, and Oliver Pogarell (Coinvestigators). From University of Munich: Klaus Tatsch, MD (Site PI); Rainer Linke, MD and Thomas Schwarzmüller, MD

(Coinvestigators). From University of Ulm: Johannes Schwarz, MD (Site PI); Alexander Storch MD and Vincent A Ries, MD (Coinvestigators). From University of Glasgow: Drs. Donald G Grosset and Jim Patterson (Site PIs); Dr. Hani Benamer (Coinvestigator); Tracy Murphy, RGN (Site Coordinator). From University of Nijmegen: MWIM Horstink, MD, PhD and Dr. Henricus JW Sips (Coinvestigators). From University College London: Andrew J Lees, MB BS, MRCP, MD, FRCP and Durval C Costa MD, MSc, PhD, FRCR (Site PIs); Svetislav Gacinovic, MsC, MD and Dr. M Doder (Coinvestigators). From Ghent University: Rudi A Dierckx and Danny AC Decoo MS (Site PIs); Dr. Jan Versijpt and Chris Ven der Linden MD (Coinvestigators). From Frear and Associates: Dr. Tracy JB Frear (Study Coordinator).

**PDT301:** Physician Investigators (in order by country). Ian G McKeith, MD, BS, FRCPsych, FSB, FMedSci and John O'Brien, BM BCh, FRCPsych, DM (Newcastle University, Blinded Image Examination [BIE] Consensus Panel [CP] members); Zuzanna Walker (University College London, BIE CP); Thomas Alan (Bensham General Hospital/Gateshead); Clive Holmes (Moorgreen Hospital/Hampshire); Naji Tabet (East Sussex County Healthcare NHS Trust); E Jayne Byrne (School of Psychiatry and Behavioural Sciences/Manchester); Peter J Conelly (Murray Royal Hospital Perth); Peter Bowie (Longley Centre/Sheffield); Gordon Wilcock (BRACE Centre/Bristol). Klaus Tatsch (BIE SPECT Reader) and Adrian Danek (Ludwig Maximilians University Munich); Alexander Kurz (TU Munich); Wolfgang H Oertel (University of Marburg); Johannes Schwarz (Hospital University Leipzig); Guy Arnold, PD and Eike Spruth, PD (Humboldt University Berlin); Thomas Müller (Ruhr-University Bochum); Inga Zerr (Georg-August University

Göttingen); Cornelius Weiller and Achim Leipert (University Hospital Eppendorf); Reinhard Dengler (Medizinische Hochschule Hannover); Peter Urban, PD and Andreas Fellgiebel (Johannes Gutenberg University Mainz). Franz Aichner (OÖ Landesnervenklinik); Gerhard Ransmayr (Linz General Hospital); Michael Rainer (SMZ-Ost Donauspital, Vienna); Susanne Asenbaum (Hospital University Vienna). Giovanni Castelnovo (CHU Nîmes Hospital); Jacques Darcourt (University of Nice Sophia-Antipolis, BIE SPECT Reader); Jean M Orgogozo (University of Bordeaux); Florence Pasquier (Roger Salengro Hospital/Lille). Gilberto Pizzolato and Gianluigi Riccherieri (University of Padova); Alberto Albanese (“Besta” National Neurological Institute, Milan); Ubaldo Bonucelli (University of Pisa); Alessandro Padovani (Università degli Studi di Brescia). Eduardo Tolosa MD (University of Barcelona); Lorenzo M Gracia (University of Getafe, Madrid); J Andrés Burguera (University Hospital La Fe/Valencia); Eulegio G Neciga (University of Virgen del Rocio, Seville). Maria MP Costa (HPP Molecular Medicine, Porto). Jan Booij (AMC, BIE SPECT Reader). Dag Aarsland (Stavanger University); Jan Aasly (St. Olav’s Hospital/Trondheim); Frode Willoch (Aker Hospital, Oslo). Lars O Wahlund (Karolinska University, Stockholm); Ulla Passant (Lund University); Elisabet Londos PD (MAS University, Malmö). Martin Bojar (Charles University Prague).

**PDT304:** Physician Investigators. From University of Glasgow: Donald G Grosset (Investigator); Jim Patterson, Angela O’Donnell, Mary T Hansen, Bianca Holmes, David Brown, Tracy Murphy, Katherine Grosset, Marlene Smeaton, Donald Hadley, Kate M Bryce, and Elaine Tyrell (Subinvestigators). From University of Marburg: Wolfgang H Oertel (Investigator); Anja Gerstner, Helmut Höffken,



K Joseph; Meike L Schipper, Doris L Pfeiffer, Aline Metz, Andreas Fischer, Martin Gotthardt, Sylvia Rura, Halina Pollum, and Thomas Behr (Subinvestigators). From New Cross Hospital, Wolverhampton: Hani Benamer (Investigator); Christopher M Boiven, Philip Anderson, Jillian Andrews, Susan Ackrill, Lindsey Halliburton, Jill Conley, Alan Deakin, Elizabeth McLelland, David Borell, and Richard M Poyner (Subinvestigators). From Southampton General Hospital: Paul M Kemp (Investigator); Lucy Bolton, Helen Roberts, James Thom, Ian Gove, Livia Bolt, John S Flemming, Sandra Johns, Maureen Zivanovic, and Syed Zaman (Subinvestigators). From Newcastle General Hospital: Dr. David Burn (Investigator); John Fenwick, Andrea Stutt, Una Brechany, Susan Faulkner, and Sophie Molloy (Subinvestigators). From University of Barcelona: Eduardo Tolosa (Investigator); Francisco Lomeña, Francesco Valldeoriola, Jose J Mateos, and Maria L Ortega (Subinvestigators). From Holy Cross and St. Paul's Hospital, Barcelona: Jaime Kulisevsky (Investigator); Berta Pascual, Ana M Catafu, Jolanda A Puente, Angel H Fructuoso, Antonia Campolongo, and Montserrat Estorch (Subinvestigators). From University Hospital UCL Mont-Godinne, Belgium: Dr. T van der Borght (Investigator); Eric Mormont (Subinvestigator). From University Hospital Coimbra: Luís Cunha (Investigator); João P de Lima, Joao MA Neto, and M Cunha (Subinvestigators). From Leopold Franzens University Innsbruck: W Poewe (Investigator); Roy Moncayo, Georg Riccabona, Eveline M Donnemiller, Klaus Seppi, Boris B Aurel, Clemens Decristoforo, Michael Gabriel, and Dirk R Hente (Subinvestigators).

**PDT307:** From University of Glasgow: Drs. Donald Grosset, Katherine Grosset, Donald Hadley, David Wyper, and Jim Patterson (Clinical Physicist), and Tracy Murphy (Study Research Coordinator). From Ludwig Maximilians University Munich: Drs. Klaus Tatsch and Gabriele Poepperl. From University College London: Drs. Durval C Costa and Andrew J Lees. From Ghent University: Drs. Danny AC Decoo and Jan Versijpt. From University of Marburg: Drs. Wolfgang H Oertel, Anja Gerstner, Martin Gotthardt, H Höffken, K Joseph, Halina Pollum, Sylvia Rura. From University of Ulm: Alexander Storch.

**PDT408:** Physician Investigators. Eduardo Tolosa (Coordinating Investigator) and Francisco Lomeña (University of Barcelona). Ana M Catafu (Coordinating Investigator) and Jaime Kulisevsky (Holy Cross and St. Paul's Hospital). Patrice Laloux and Thierry Van der Borgh (University Hospital UCL Mont-Godinne); Michael Van Zandijcke and Frank De Geeter (AZ St. Jan, Belgium); Alain Destee and Marc Steinling (Roger Salengro Hospital Lille); Lucette Lacomblez and Marie O Habert (Pitie Salpetriere Hospital, Paris); Cornelius Weiller and Malte Clausen (University Hospital Eppendorf); Ulrich Bogdahn and Chr. Eilles (Regensburg University, Germany); Anton Haas and Carl M Kirsch (University of Saarland, Homburg); Angelo Antonini and Riccardo Benti (Maggiore Hospital, Milan); Sandro Sorbi and Alberto Pupi (Florence University); Luís Cunha and João P de Lima (University Hospital Coimbra); Ray Chaudhuri and Muriel B Thomas (King's College Hospital, UK); William RG Gibb and Paul M Kemp (Southampton General Hospital); Susanne Asenbaum and Robert Dudczak (University Hospital Vienna).

**PDT409:** Physician Investigators. Andreas Kupsch, Bianca Müller, and Michail Plotkin (Charité Hospital, Berlin); Carsten Buhmann (University Hospital Hamburg-Eppendorf); Gunther Ladurner (Christian Doppler Klinik, Salzburg); Donald G Grosset (University of Glasgow); Helen C Roberts (Southampton General Hospital); Nin Bajaj (Derbyshire Royal Infirmary); Alain Kaelin and Urs Pato (University Hospital Bern); Tove Hauge (Molde Hospital, Norway); Jan O Aasly (St. Olav's Hospital); Pierre Charpentier (Central Hospital of Béthune, France); Antonio Tartaglione (Sant' Andrea Hospital, La Spezia); Juan CM Castrillo (Hospital Ramón y Cajal, Madrid); José B Gomez (University of Getafe); Maria DE Jaime (Hospital Meixoeiro de Vigo, Pontevedra); Jesper B Clausen (KAS Glostrup Hospital, Denmark); Robert Hauser (University of South Florida); Burton Scott (Duke University); Ken Marek, John Seibyl, and Danna Jennings (Institute for Neurodegenerative Disorders); Frank L Weiland (Sutter Health, Roseville CA).

**GE-001-013:** Physician Investigators. Coordinating Investigator, Zuzana Walker (University College London); Michael Rainer (SMZ-Ost Donauspital); Gerhard Ransmayr and Michael Gabriel (Linz General Hospital); Florence Pasquier and Franck Semah (Roger Salengro Hospital); Giovanni Castelnovo and Dr. Collombier (CHU Nîmes Hospital); Christoph Schrader and Georg Berding (Medizinische Hochschule Hannover); Reinhard Ehret (Berlin Neurology); Uwe Stabell (Diagnostic and Therapeutic Nuclear Medicine Practice, Berlin); Joseph Classen and Osama Sabri (University Hospital Leipzig); Adrian Danek and Christiane La Fougere (Ludwig Maximilians University Munich); Harald Hampel and Frank Grunwald (University Hospital Frankfurt); Gilberto Pizzolato, Di Santo Gianpaolo, and Franca Dore (University of Trieste); Alessandro Padovani, Dr. Giubbini, and Barbara Paghera (Università

degli Studi di Brescia); Ubaldo Bonucelli and Duccio Volterrani (University of Pisa); Albert Lladó and Francisco Lomeña (University of Barcelona); M Dolores M Lozano, Alfonso Lara, and Daniel Flores (Hospital of the Magdalena, Castellon); Eulogio G Neciga and David G Solis (University of Virgen del Rocio); J McCleery (Oxfordshire & Buckinghamshire Mental Health NHS Foundation Trust, Oxon); Gill Oliver (John Radcliffe Hospital, Oxford); Naji Tabet (East Sussex County Healthcare NHS Trust, Uckfield); Lynn Jenkins (Brighton & Sussex University Hospitals NHS Trust, Royal Sussex County Hospital); Tim Stevens (St. Margaret's Hospital, Essex); C Barber and Paula Sandhu (Princess Alexandra Hospital, Essex); Alan Thomas (Newcastle University); Kim Howe and James Lloyd (Royal Victoria Infirmary, Newcastle); Fraser Inglis (Glasgow Memory Clinic Ltd); Joanne Prosser (Gartnavel Hospital, Glasgow); Marianna Leontis (North Essex Partnership NHS Foundation Trust); Rhiannon Ducksbury (North Essex Partnership NHS Foundation Trust Broomfield Hospital); Guillermo A Ferrer and Jaume Daumal (University Hospital Son Espases, Palma de Mallorca); Maria JM Carretero and Andrew Serena (Hospital Meixoeiro de Vigo); Derek Brown (Stobhill Hospital, Glasgow).
